# Supplementary material
Source: Elsevier journal article supplement (https://arts.units.it/retrieve/096530b3-71fd-44c1-8a15-6f82e4d20ab1/mmc1.pdf)
Supplement: mmc1 [file mmc1.pdf]

**A**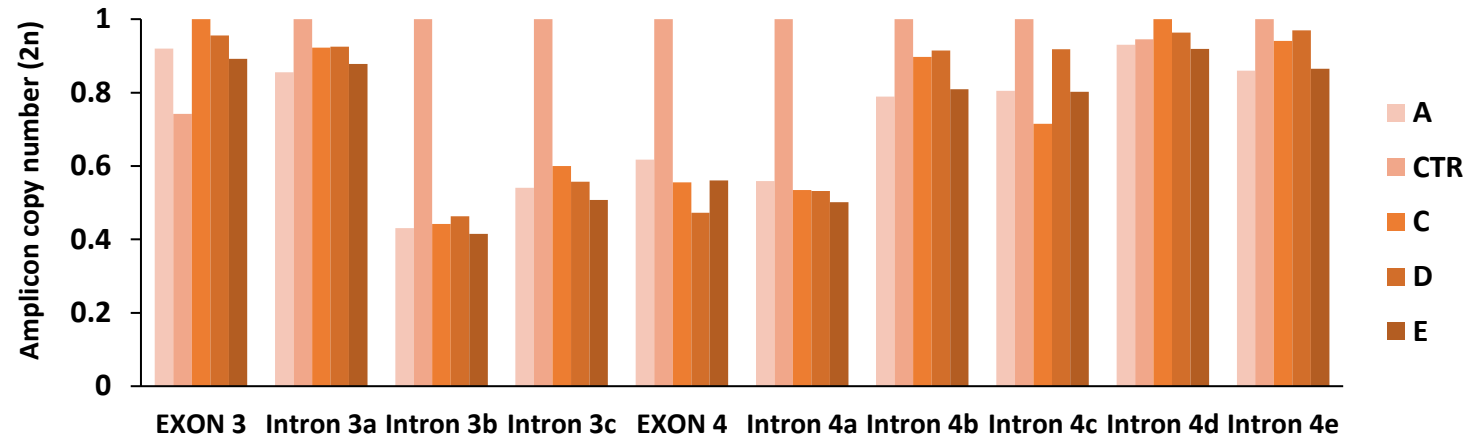**B**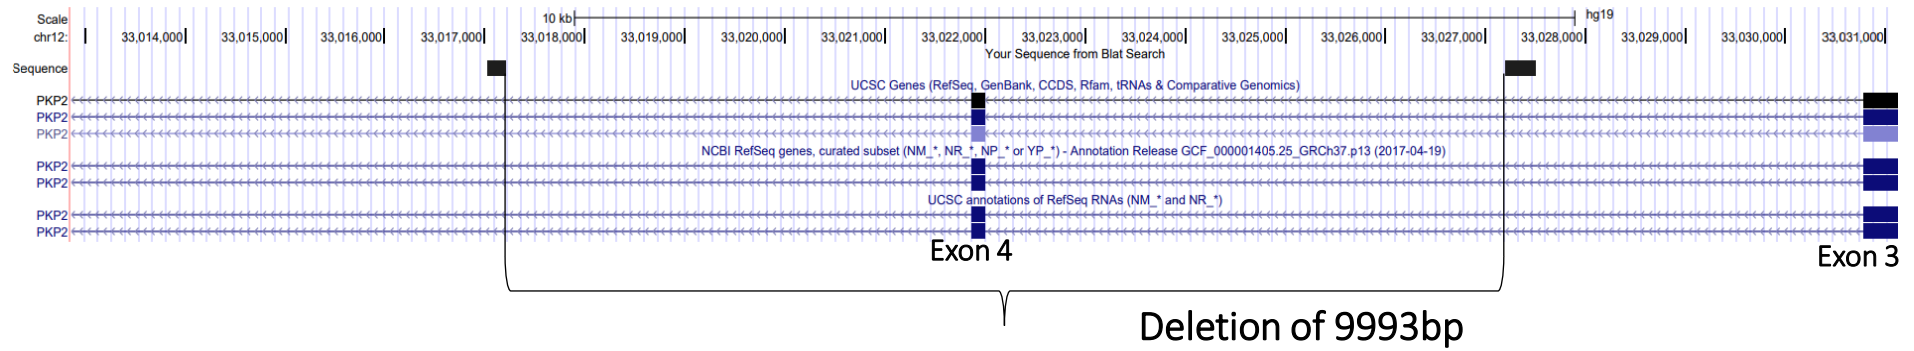**C**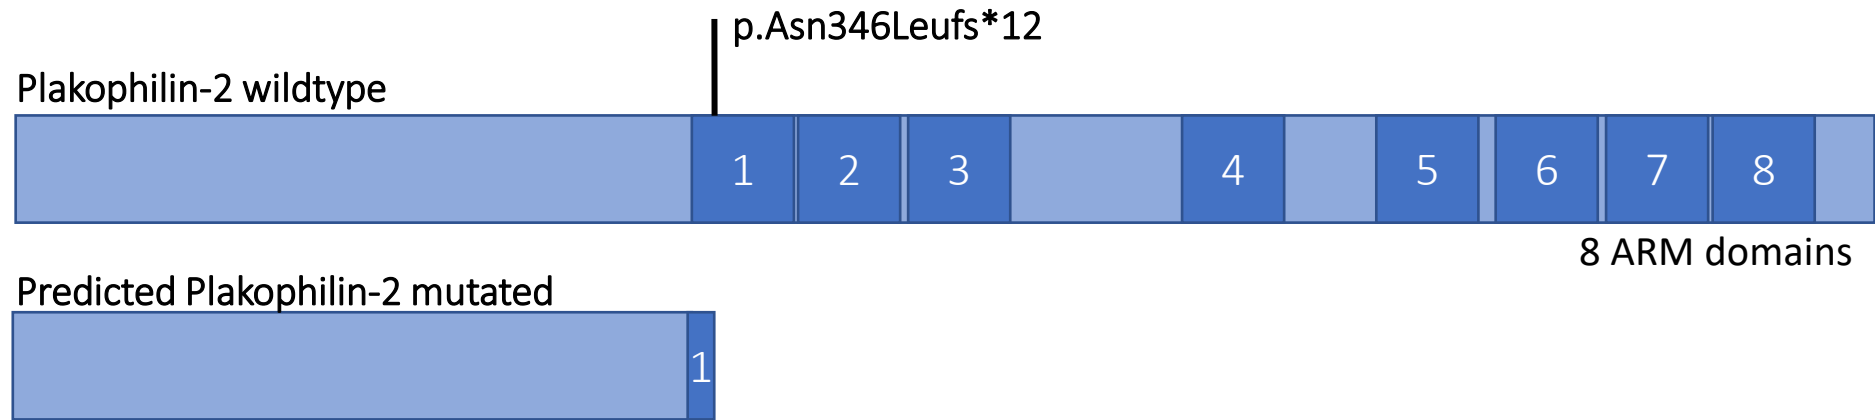

**Fig. S1:** Characterization of *PKP2* mutation. A) By quantitative PCR, we identified the breakpoints of *PKP2* mutation within intron 3 and intron 4. A value of 0.4 to 0.6 was indicative of the amplicon deletion. B) By Sanger sequencing, a deletion of 9993 bp was identified. C) Representation at protein level of the heterozygous deletion effect. It is predicted to insert a premature stop codon within the first ARM repeat, leading to a truncated protein.
